# Supplementary material for: STAT4 increases the phenotypic and functional heterogeneity of intestinal tissue-resident memory T cells
Source: PubMed Central journal article supplement — Mucosal Immunol. Author manuscript; Available in PMC 2023 Jul 7. (PMC10327535; doi:10.1016/j.mucimm.2023.03.002), 2023-03-15
Supplement: NIHMS1910795-supplement-1.pdf [file NIHMS1910795-supplement-1.pdf]

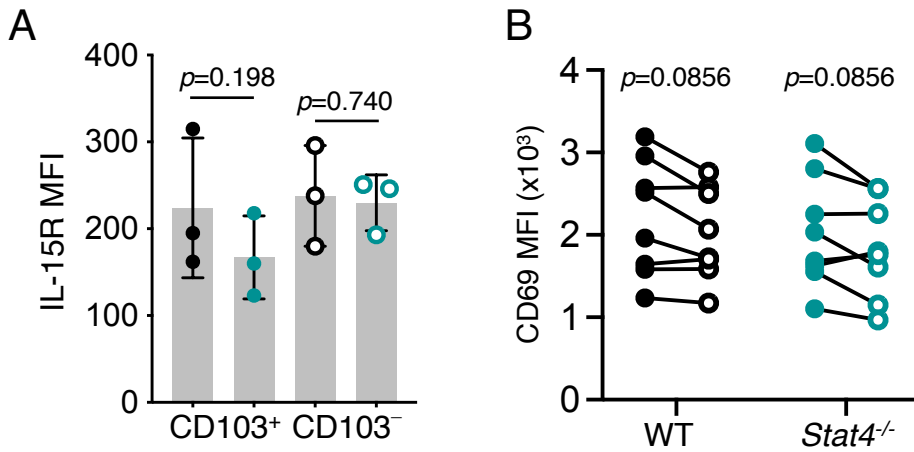

**Supplementary Figure 1: Expression of IL-15R and CD69 on LP T cells.** Mice received congenically distinct WT and *Stat4*<sup>-/-</sup> YopE T cells (A) or OT-I T cells (B) prior to infection with Yptb-OVA (b). Tissues were harvested at day 9 p.i., and the expression of IL-15R/CD122 was measured on CD69<sup>+</sup>CD103<sup>+</sup> and CD69<sup>+</sup>CD103<sup>-</sup> LP T cell using flow cytometry (A). Mean fluorescence intensity (MFI) is shown and data are representative of 2 experiments. (B) MFI of CD69 was examined on LP CD69<sup>+</sup>CD103<sup>+</sup> and CD69<sup>+</sup>CD103<sup>-</sup> T cells, and data are pooled from 3 experiments. Exact p values are shown and were calculated using paired Student's *t*-test.
